1 Zinc dysregulation in *slc30a8* (*znt8*) mutant zebrafish  
2 leads to blindness and disrupts bone mineralisation

3 **Authors:**

4 Eirinn W Mackay<sup>1,2</sup>, Sofía Ibañez Molero<sup>1</sup>, Lavitasha Harjani Tirathdas<sup>1</sup>, Josi Peterson-Maduro<sup>2</sup>, Jingjing Zang<sup>3</sup>,  
5 Stephan C.F. Neuhauss<sup>3</sup>, Stefan Schulte-Merker<sup>2,4</sup>, Stephen W. Wilson<sup>1</sup>

6 **Author affiliations:**

7 <sup>1</sup>Department of Cell and Developmental Biology, University College London, Gower Street, London WC1E 6BT, UK

8 <sup>2</sup>Hubrecht Institute—KNAW & University Medical Centre Utrecht, 3584CT Utrecht, The Netherlands

9 <sup>3</sup>Institute of Molecular Life Sciences, University of Zurich, CH-8057 Zurich, Switzerland

10 <sup>4</sup>Institute of Cardiovascular Organogenesis and Regeneration, Faculty of Medicine, University of Münster, 48149 Münster,  
11 Germany

12 **Running title:**

13 Zinc homeostasis in osteogenesis

14 **Word count:**

15 4169 excluding methods, captions and bibliography

## 16 Abstract

17 Zinc is an essential cofactor for many cellular processes including gene transcription, insulin secretion  
18 and retinal function. Excessive free  $Zn^{2+}$  is highly toxic and consequently intracellular zinc is tightly  
19 controlled by a system of transporters, metallothioneins (MTs) and storage vesicles. Here we describe  
20 the developmental consequences of a missense allele of zinc efflux transporter *slc30a8* (*znt8*) in  
21 zebrafish. Homozygous *slc30a8*<sup>hu1798</sup> larvae are virtually blind and develop very little or no bone  
22 mineral. We show that zinc is stored in pigmented cells (melanophores) of healthy larvae but in  
23 *slc30a8*<sup>hu1798</sup> mutants it instead accumulates in the bone and brain. Supporting a role for pigment cells  
24 in zinc homeostasis, *nacre* zebrafish, which lack melanophores, also show disrupted zinc homeostasis.  
25 The photoreceptors of *slc30a8*<sup>hu1798</sup> fish are severely depleted while those of *nacre* fish are enriched  
26 with zinc. We propose that developing zebrafish utilise pigmented cells as a zinc storage organ, and  
27 that Slc30a8 is required for transport of zinc into these cells and into photoreceptors.

## 28 Introduction

29 Zinc is an essential metal found in all domains of life. Approximately ten percent of the human proteome  
30 utilises zinc, including over 1,000 transcription factors (reviewed in Hara et al., 2017). Zinc is  
31 particularly critical during development; the offspring of female rats fed a zinc-deficient diet show  
32 deformities in the skeleton, brain and eyes (Hurley and Swenert'on, 1966), and in humans, dietary zinc  
33 deficiency during gestation is linked to structural birth defects and cognitive impairment (Black, 1998;  
34 Uriu-Adams and Keen, 2010). Intracellular zinc levels are tightly regulated by a system of influx  
35 transporters (the ZIP/slca39a family), exporters (the Znt/slca30a family) and sequestering proteins  
36 (metallothioneins). Free  $Zn^{2+}$  is maintained at a very low concentration since it is a potent inhibitor of  
37 mitochondrial respiration, and it is particularly toxic to neurons (Capasso et al., 2005; Dineley et al.,  
38 2003).

39 In mice and humans, fourteen proteins in the Slca39a family transport zinc into the cytoplasm, and nine  
40 members of the Slca30a family perform the reverse function (Jeong and Eide, 2013). Slca30a (Znt) family  
41 proteins are thought to be  $Zn^{2+}/H^{+}$  antiporters (Shusterman et al., 2014). Slca30a1 is ubiquitously  
42 expressed on plasma membranes, exporting  $Zn^{2+}$  to the extracellular milieu, while Slca30a members 2-  
43 9 are localised to internal membranes and direct  $Zn^{2+}$  into organelles or vesicles to effect specific  
44 functions (Huang and Tapaamorndech, 2013). For example, mice with the *lethal milk* allele (Slca30a4<sup>-/-</sup>  
45 ) are unable to secrete zinc into breast milk (Huang and Gitschier, 1997), while Slca30a2 fulfils this  
46 function in humans (Chowanadisai et al., 2006). Mammalian Slca30a8 is largely restricted to the beta  
47 cells of the pancreas where it provides  $Zn^{2+}$  to insulin secretory granules. Slca30a8<sup>-/-</sup> mice are predisposed  
48 to developing diabetes but are otherwise healthy (Chimienti et al., 2004; Lemaire et al., 2009).  
49 Intracellular zinc is sequestered and delivered to enzymes by metallothioneins (MTs), small redox-  
50 sensitive proteins with extraordinarily high affinity for  $Zn^{2+}$ .

51 Phylogenetic comparison of the Slca30 family between mammals and teleosts uncovered orthologues of  
52 all but mammalian Slca30a3 and Slca30a10 (Feeney et al., 2005). Mammalian Slca30a10 has since been  
53 recognized as a manganese transporter (Tuschl et al., 2012), and a fish orthologue identified (Xia et al.,  
54 2017). Slca30a3 is the predominant transporter found in the mammalian brain, transporting  $Zn^{2+}$  into  
55 presynaptic vesicles in glutamatergic neurons (Frederickson et al., 2005). Slca30a3 also maintains zinc  
56 homeostasis in the retina (Ugarte and Osborne, 2014). The absence of a direct orthologue of Slca30a3 in  
57 teleosts raises the question of whether another member of the Slca30a family provides these important  
58 functions. The metallothionein (MT) family is also reduced in teleosts: four mammalian MT genes are  
59 known, while two zebrafish MT genes, *mt2* and *mtbl*, have been identified (Chen et al., 2004; Hiu-Mei  
60 Yan and Chan, 2002) with *mt2* demonstrating a dose-dependent response to zinc and cadmium (Brun  
61 et al., 2014; Wu et al., 2008).

62 Here we describe the loss of zinc homeostasis and subsequent developmental defects in a zebrafish line  
63 (*hu1798*) carrying a mutation in *slca30a8* (*znt8*). Homozygous larvae are almost entirely devoid of  
64 mineralised bone, while large deposits of zinc were observed in bone structures and in some cases the  
65 brain. Both *slca30a8* and *mt2* are strongly up-regulated in the brain and gut of *slca30a8*<sup>hu1798</sup> larvae

66 suggesting there is a feedback mechanism by which  $Zn^{2+}$  levels regulate expression of zinc regulatory  
67 genes. In wild-type zebrafish, zinc was found to accumulate in melanophores - pigmented epithelial  
68 cells known as melanocytes in mammals - but was absent in these cells in *slc30a8<sup>hu1798</sup>* embryos. *Nacre*  
69 zebrafish, which lack melanophores, have accumulations of zinc in the bone and brain but do not show  
70 overt defects in mineralisation unless challenged with increased environmental  $ZnCl_2$ .

71 Homozygous *slc30a8<sup>hu1798</sup>* larvae were also found to be completely blind and examination of the retina  
72 showed major reductions in the density of photoreceptors, which were also devoid of zinc. Based on  
73 these phenotypes and expression patterns, we propose that during development, zebrafish Slc30a8  
74 sequesters zinc in pigmented cells and delivers zinc to photoreceptors.

## 75 Results

### 76 ***slc30a8<sup>hu1798</sup>* larvae have reduced bone calcification and dark pigmentation**

77 The *hu1798* mutant was identified in a forward genetic screen for bone defects using alizarin red, a  
78 histological stain for calcium (Puchtler et al., 1969; Spoorendonk et al., 2010). Compared to  
79 heterozygous and wild-type siblings, homozygous *hu1798* larvae showed substantially less alizarin red  
80 staining at 5 days post-fertilisation (dpf) (**Fig. 1A**). The operculum and cleithrum were under-calcified  
81 and no staining was visible around the notochord or vertebrae. To help understand the alterations to  
82 bone mineral composition in *hu1798* mutants, we utilised the von Kossa stain for phosphate (Rungby  
83 et al., 1993). Phosphate was reduced or absent in bone elements of mutants (**Fig. S1**) in a manner  
84 consistent with the reduction in alizarin red staining. Together these results indicate a lack of calcium  
85 phosphate (hydroxyapatite) mineral in the bone of *hu1798* mutants.

86 Mutant fish did not inflate the swim bladder and were not adult viable. From 5 d.p.f onwards, mutants  
87 appeared noticeably darker than siblings due to expansion of pigmented melanosomes across the  
88 cytoplasm of the dorsal melanophores (**Fig. 1B**). This change in melanophore morphology is associated  
89 with background light adaptation (Logan et al., 2006) and is disrupted when vision is compromised  
90 (Neuhaus et al., 1999).

### 91 ***hu1798* corresponds to a mutation in *slc30a8* (*znt8*)**

92 Using standard positional cloning approaches and bulk segregant analysis, the *hu1798* allele was  
93 mapped to a region on chromosome 19 containing two genes, *rprd1a* and *slc30a8* (**Fig. 1C**). The exons  
94 of both genes were sequenced revealing an A-T substitution in exon 5 of *slc30a8*. The resulting  
95 substitution, H239Q, affects a strictly conserved residue (orthologous to human His 220) in a histidine-  
96 rich region which, based on studies in orthologous proteins (discussed below), is predicted to abolish  
97 zinc transport (**Fig. 1D,E**). Given Slc30a8 is a zinc transporter and we find defects in zinc localisation  
98 in *hu1798* mutants (described below), we conclude that the H239Q mutation in *slc30a8* is causative of  
99 the *hu1798* mutant phenotype.

100 Whole-mount *in situ* hybridization (ISH) revealed expression of *slc30a8* in cells lining the yolk at 1 dpf  
101 that declined over time in wild type embryos, whereas in mutants strong expression of the mutant

102 transcript was apparent in the gut, brain, eye and neural tube (**Fig. 1F**). This suggests that compromised  
103 Slc30a8 function leads to increased *slc30a8* expression. In support of this, previous studies have found  
104 that expression of some zinc transporters can be regulated by changes in intracellular zinc levels via the  
105 metal-responsive element-binding transcription factor-1 (MTF-1) (Kimura and Kambe, 2016; Laity and  
106 Andrews, 2007) and indeed *slc30a8* is up-regulated in the gills of adult zebrafish when excess zinc is  
107 present in the water (Feeney et al., 2005). Despite the bone phenotype in *hu1798* mutants, expression  
108 of *slc30a8* was not detectable by ISH in cells associated with mineralized elements.

109

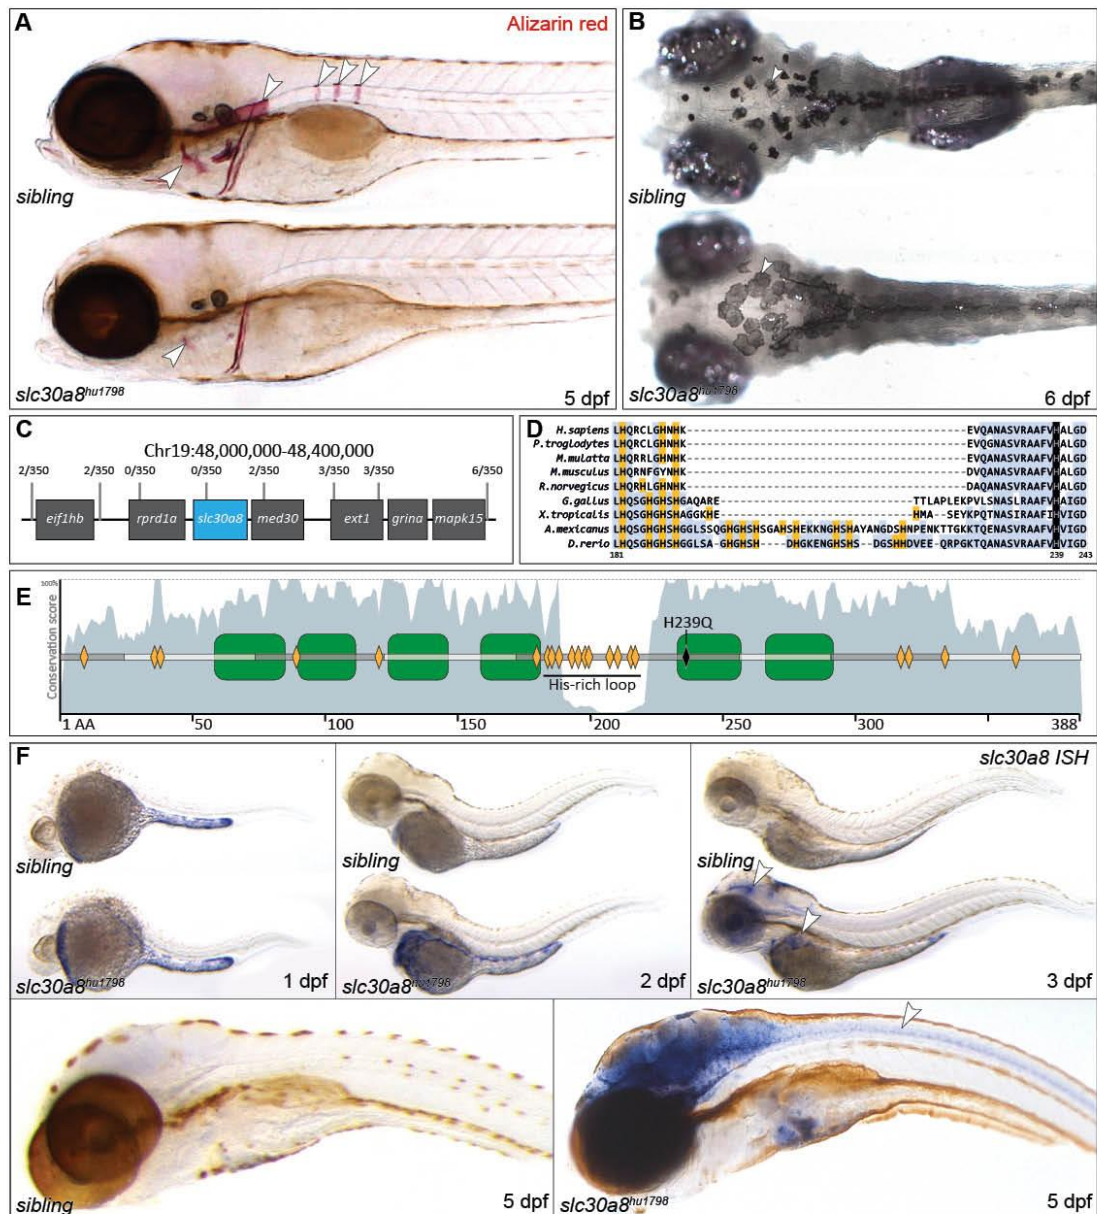

110

111 **Figure 1:** *slc30a8<sup>hu1798</sup>* mutant larvae are characterized by reduced alizarin red staining and increased  
 112 dorsal pigmentation.

113 **(A)** Alizarin red stain of larvae at 5 days post-fertilisation (dpf) reveals that *slc30a8<sup>hu1798</sup>* bone elements  
 114 are under-mineralised, particularly the operculum, the anterior notochord and the chordacentra  
 115 (arrowheads).

116 **(B)** Dorsal view showing enlarged pigment cells in *slc30a8<sup>hu1798</sup>* mutants (6 dpf).

117 **(C)** Genomic region (assembly version Zv9) linked to the mutation by positional cloning approaches;  
 118 numbers indicate the frequency of recombinant larvae found at each marker.

119 **(D, E)** The *slc30a8* allele contains a H239Q missense mutation in the 5th transmembrane domain  
 120 (green boxes). Other histidines are marked orange. ClustalX conservation score for each residue is  
 121 plotted in grey. Note that some teleosts contain an extra His-rich loop.

122 **(F)** Whole-mount *in situ* hybridization reveals increasing expression of *slc30a8* in the gut, brain, eye  
 123 and neural tube of the *slc30a8<sup>hu1798</sup>* larva compared to sibling larvae.

124

## 125 Zinc is abnormally distributed in *slc30a8* mutants

126 Mammalian pancreatic beta cells can be identified using the histological stain dithizone which produces  
127 an orange precipitate upon reaction with  $Zn^{2+}$  (Danscher et al., 1985), but the beta cells of *slc30a8*-null  
128 mice are negative for this stain as they contain insufficient zinc (Lemaire et al., 2009). We applied the  
129 dithizone stain to larvae to determine if zinc was altered in the pancreas of mutants. While staining was  
130 not detected in the pancreas of wild type or mutant larvae, the stain was visible in the head and  
131 craniofacial bone elements of *slc30a8<sup>hu1798</sup>* larvae from 4 d.p.f onwards, while siblings showed little or  
132 no staining anywhere (**Fig. 2A**). This suggests that the loss of calcium phosphate is accompanied by  
133 increased zinc in forming bones. Supporting this, the fluorescent sensor, TSQ (6-methoxy-8-p-  
134 toluenesulfonamido-quinoline) which forms TSQ-Zn-protein adducts (Frederickson et al., 1987;  
135 Meeusen et al., 2011) revealed zinc in bone elements, brain and neural tube in *slc30a8<sup>hu1798</sup>* larvae but  
136 not in siblings (**Fig. 2B**). Conversely, in siblings TSQ-Zn fluorescence revealed zinc deposits in the  
137 skin in a pattern resembling melanophores, while no such fluorescence was visible in *slc30a8<sup>hu1798</sup>*  
138 larvae (**Fig. 2C**).

139 These results suggest that the normal accumulation of zinc in melanophores fails in *slc30a8* mutants  
140 and this leads to accumulation in bone and other sites. To explore this idea, we examined zinc  
141 distribution in *nacre<sup>w2</sup>* larvae, which lack melanophores due to a mutation in the *mitfa* transcription  
142 factor required for differentiation of melanophores from the neural crest lineage (Lister et al., 1999).  
143 TSQ-Zn fluorescence was absent in the skin of *nacre<sup>w2</sup>* larvae whereas, similar to *slc30a8<sup>hu1798</sup>* larvae,  
144 zinc accumulated in the bone (**Fig. 2D**). Compared to siblings, the eyes of *nacre<sup>w2</sup>* larvae displayed  
145 more intense TSQ-Zn fluorescence while none was visible in the eyes of *slc30a8<sup>hu1798</sup>* larvae.

146 To examine the relationship between zinc and the under-calcified bone phenotype of *slc30a8<sup>hu1798</sup>*  
147 larvae, we assessed expression of the osteoblast marker *osterix:GFP* (Spoorendonk et al., 2008) and  
148 stained larvae with both TSQ and alizarin red. GFP was clearly visible in osteoblasts adjacent to  
149 mineralising craniofacial elements such as the operculum and cleithrum (**Fig. 2E**). The operculum was  
150 smaller in mutant larvae and alizarin red staining was diminished and poorly defined, while TSQ stained  
151 the mineral matrix and not the osteoblasts themselves. This indicates that zinc is interacting with the  
152 bone mineral directly, and therefore the reduction in calcium hydroxyapatite is likely to be due to excess  
153  $Zn^{2+}$  ions in the mineral, rather than through inhibition of osteoblast function by  $Zn^{2+}$ .

154

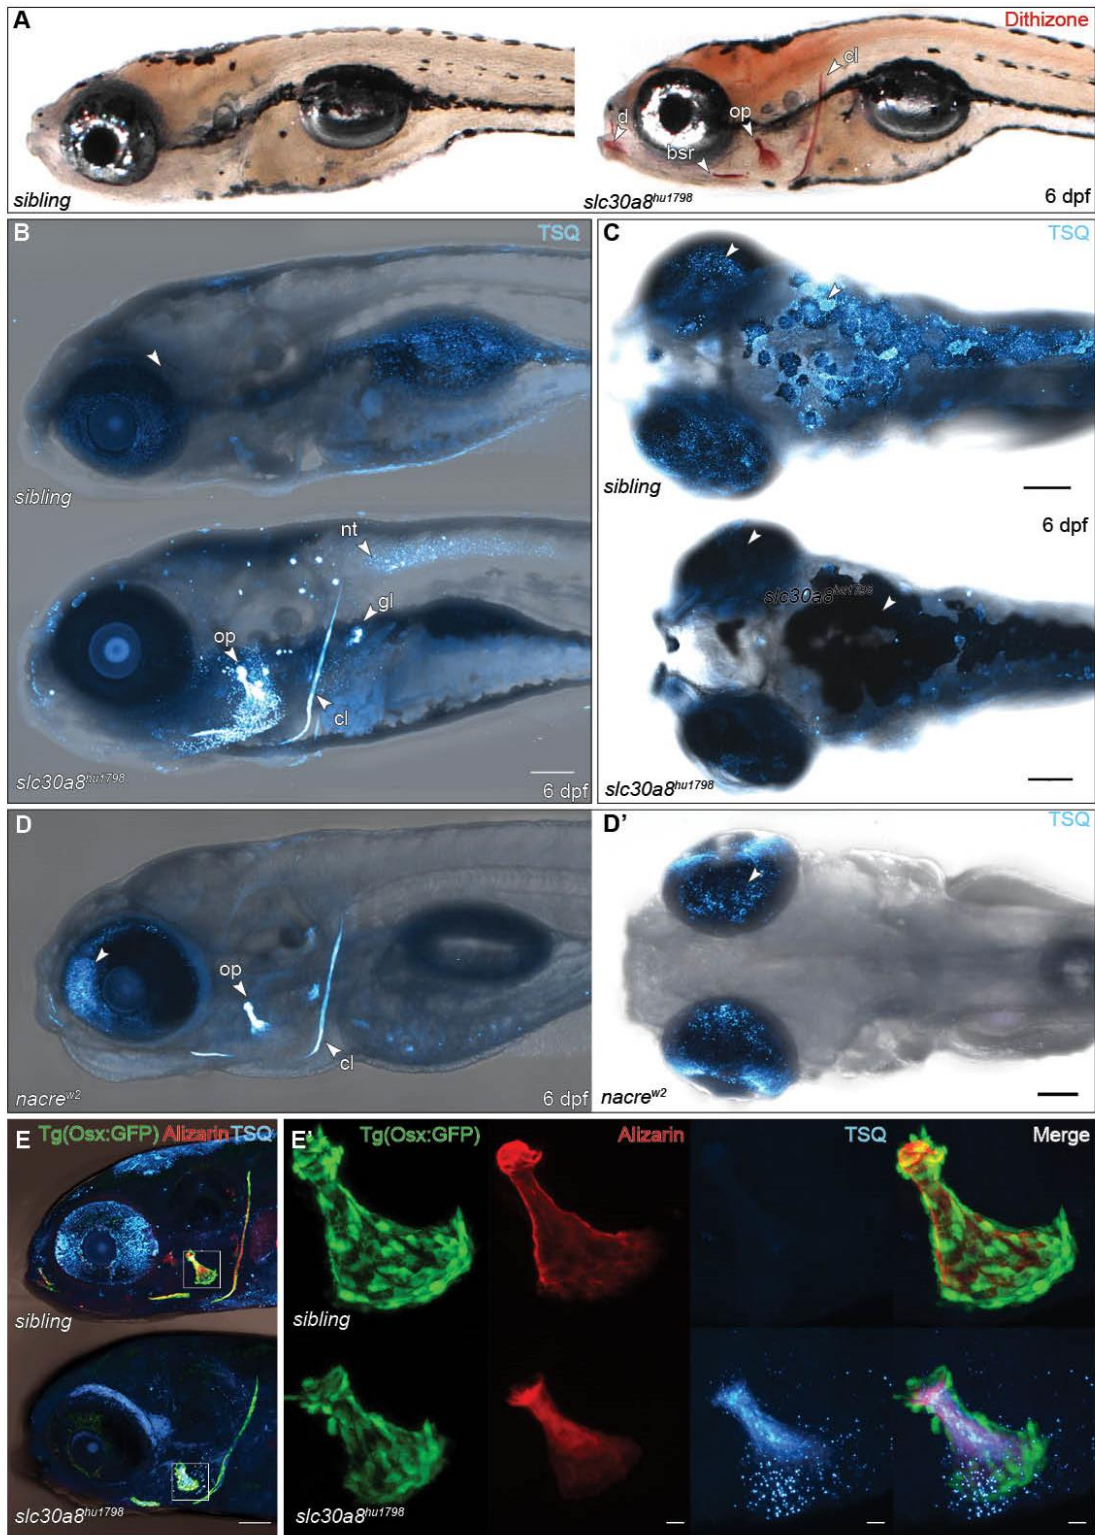

155

156 **Figure 2:** Zinc distribution is altered in *slc30a8<sup>hu1798</sup>* larvae.

157 **(A)** Dithizone stain reveals zinc to be concentrated in craniofacial bone elements such as the cleithrum  
158 (cl), operculum (op), branchiostegal ray (bsr) and dentary (d), and the brain of the *slc30a8<sup>hu1798</sup>* larva.  
159 **(B)** TSQ fluorescence confirms increased zinc in bone elements of mutant larvae compared to those of  
160 siblings. Fluorescence was also observed in the neural tube (nt) and in kidney glomeruli (gl).

161 **(C)** Dorsal view showing TSQ-Zn is normally associated with melanophores and in the eye, but this  
162 pattern is absent in *slc30a8<sup>hu1798</sup>* larvae.

163 **(D)** Lateral and dorsal views of *nacre<sup>w2</sup>* larvae, which lack melanophores, showing zinc accumulation in  
164 bones and eyes.

165 **(E)** Mutant larvae still contain active osteoblasts as revealed by expression of the marker *osterix*:GFP  
166 around the operculum. **(E')** Magnification of the operculum of 6 dpf larvae. In *slc30a8<sup>hu1798</sup>* larvae this  
167 bone element is smaller, with less mineral as shown by alizarin staining. TSQ staining shows that zinc  
168 is associated with the bone mineral and not the *osterix*-positive osteoblasts.

169 Scale bar in (B-D) = 100  $\mu$ m, (E) = 10  $\mu$ m.

170



171 **Bone mineralisation in *nacre* fish is affected by zinc**

172 Unlike *slc30a8<sup>hu1798</sup>* fish, which are not adult-viable, *nacre* fish are healthy, and juveniles stained with  
 173 TSQ revealed a striking zinc-rich skeleton, while siblings predominantly showed TSQ-Zn in  
 174 melanophores (**Fig. 3A**). Alizarin red staining did not reveal a difference in bone mineralisation of  
 175 untreated *nacre* larvae, but the addition of 10  $\mu\text{M}$   $\text{ZnCl}_2$  to the embryo media from 6 h.p.f to 5 d.p.f  
 176 resulted in *nacre* larvae with bone elements completely devoid of calcium hydroxyapatite while a  
 177 moderate reduction was observed in siblings (**Fig. 3B**). At a higher dose of  $\text{ZnCl}_2$  (100  $\mu\text{M}$ )  
 178 mineralisation was inhibited regardless of genotype (**Fig. 3C**). Both 10  $\mu\text{M}$  and 100  $\mu\text{M}$  concentrations  
 179 proved lethal to *slc30a8<sup>hu1798</sup>* embryos, most of which died before emerging from the chorion. These  
 180 results give weight to the notion of  $\text{Zn}^{2+}$  as a mineralisation inhibitor and suggest the altered zinc  
 181 homeostasis detected in *nacre<sup>w2</sup>* fish is a milder form of the *slc30a8<sup>hu1798</sup>* phenotype, perhaps due to the  
 182 eyes of *nacre* larvae acting as a secondary reservoir for zinc (discussed below).

183 Neither *slc30a8<sup>hu1798</sup>* nor *nacre* larvae showed a difference in total Zn content as measured by  
 184 inductively coupled plasma atomic emission spectroscopy (ICP-AES), while Ca content was 2-fold  
 185 lower in *slc30a8<sup>hu1798</sup>* larvae reflecting the under-mineralised bone (**Fig. 3D**). This suggests that the  
 186 phenotypic defects in *slc30a8<sup>hu1798</sup>* and *nacre* embryos result from altered distribution rather than altered  
 187 overall levels of zinc.

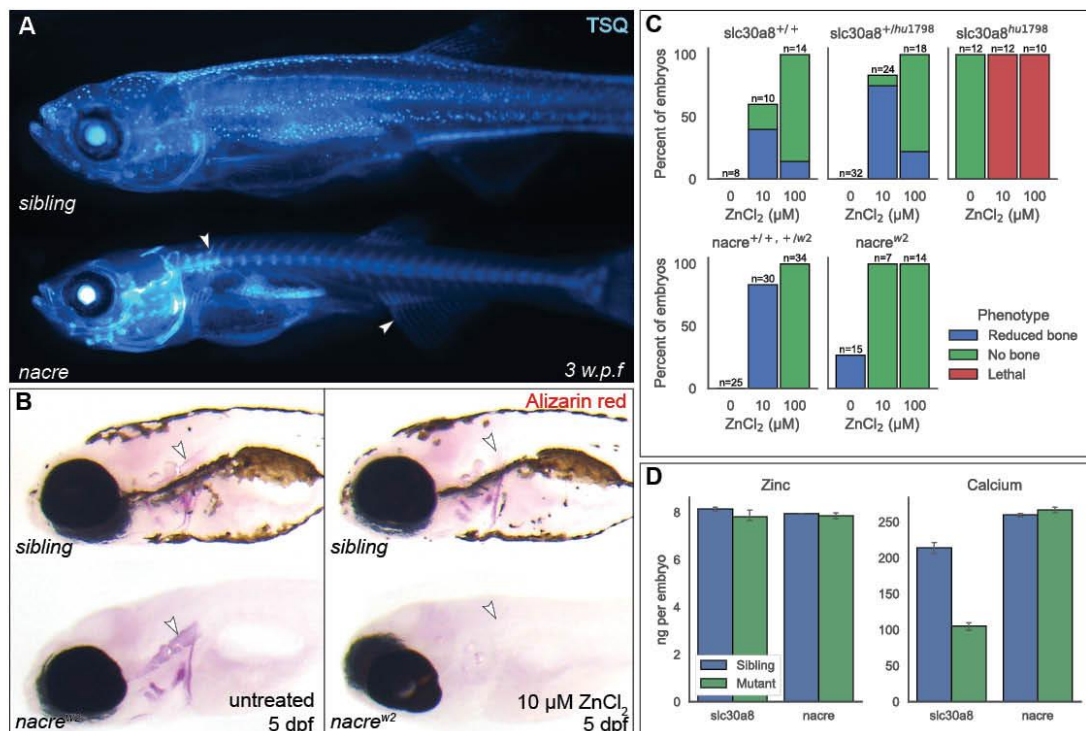

188

189 **Figure 3:** Bone mineralisation in *nacre* fish is affected by zinc.

190 **(A)** Widefield fluorescent image of *nacre<sup>w2</sup>* and sibling juveniles at 3 weeks' post-fertilisation  
 191 demonstrating TSQ fluorescence in the skeleton of the *nacre* fish, notably in the spine and fins.

192 **(B)** Alizarin red bone stains of *nacre* and sibling larvae incubated with or without 10  $\mu\text{M}$   $\text{ZnCl}_2$  in the  
 193 media. Arrowheads indicate the notochord.

194 **(C)** Summary of phenotypes generated by  $\text{ZnCl}_2$  treatment from 1 dpf to 5 dpf in *nacre* and *slc30a8<sup>hu1798</sup>*  
 195 larvae.

196 **(D)** Total zinc and calcium content per embryo as determined by ICP-AES. Columns show mean values  
 197  $\pm$ SEM across 3 groups of pooled larvae.

198

199 **Metallothionein levels are up-regulated in *slc30a8<sup>hu1798</sup>* larvae**

200 As MT proteins help to maintain Zn homeostasis by sequestering excess zinc, we speculated that  
201 expression of the zebrafish intracellular zinc-sequestering protein metallothionein (MT) gene *mt2* may  
202 be altered in *slc30a8<sup>hu1798</sup>* fish as a response to altered zinc distribution. To assess *mt2* levels we detected  
203 the endogenous *mt2* gene by ISH and also generated a transgenic line using a fragment of the *mt2*  
204 promoter, previously shown to be zinc-responsive (Chen et al., 2004), upstream of a cassette encoding  
205 GFP.

206 High levels of *mt2* expression were evident in the brain, eyes, neural tube and gut of 3 dpf *slc30a8<sup>hu1798</sup>*  
207 larvae but undetectable in siblings (**Fig. 4A**). GFP fluorescence was observed in the same tissues as  
208 detected by ISH, while in siblings GFP was restricted to a few isolated cells in the skin (**Fig. 4B**). GFP  
209 was most strongly expressed in the brain from 4 dpf onwards, preceding the appearance of TSQ-Zn in  
210 the brain at 6 dpf. In both wild type and *slc30a8<sup>hu1798</sup>* larvae and across all tissues, GFP and TSQ-Zn  
211 occupied distinct territories and were not observed in the same cells (**Figs. 4B-D**). This spatial  
212 separation between *mt2:gfp* and TSQ-Zn is most clearly evident in the neural tube (**Fig. 4D**), where  
213 GFP-positive cells resembling neurons were adjacent to (but not co-located with) many smaller  
214 (subcellular) TSQ-Zn bodies. Drawing on a study reporting that (under normal conditions) zebrafish  
215 *mt2* expression in the brain is localised to neurons and not glial cells (Teoh et al., 2015), these  
216 observations suggest that distinct neural cell populations respond to disrupted zinc homeostasis in  
217 different ways, with neurons increasing MT activity and others developing zinc inclusions.

218 To help validate the notion of *nacre<sup>w2</sup>* larvae featuring a mild form of zinc dysregulation, we examined  
219 *nacre<sup>w2</sup>* larvae expressing *mt2:gfp* which revealed GFP fluorescence in a pattern identical to siblings  
220 (i.e. none or very few cells expressing GFP). Following incubation with ZnCl<sub>2</sub> concentrations as low as  
221 0.1 μM, however, distinctive GFP expression was observed in the hindbrain and neural tube (**Fig. 4E**).  
222 Sibling larvae under these conditions simply showed an increase in zinc content of melanophores.

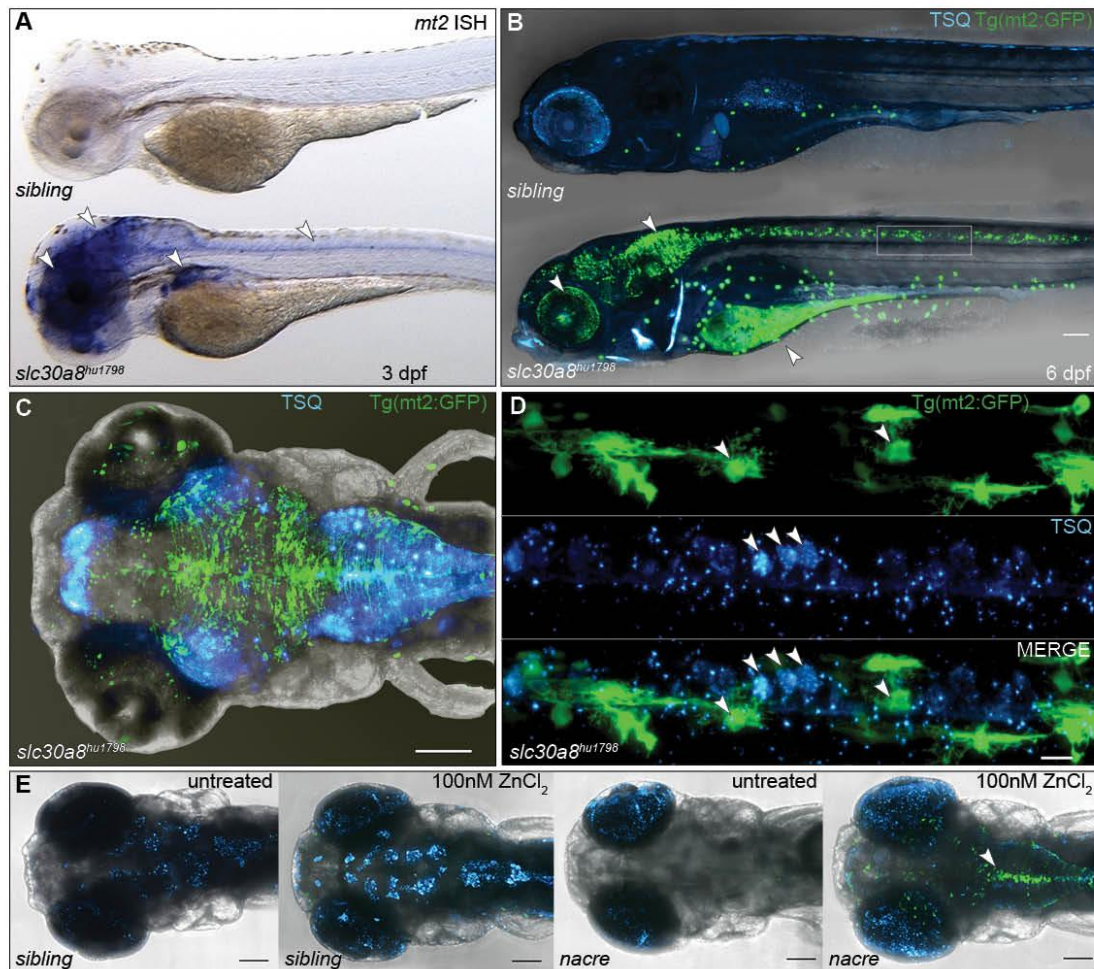

223  
224  
225  
226  
227  
228  
229  
230  
231  
232  
233  
234  
235

**Figure 4:** Metallothionein (*mt2*) expression is up regulated in *slc30a8<sup>hu1798</sup>* larvae.

(A) Whole mount ISH showing extremely elevated expression of *mt2* in the brain, eye, gut and neural tube of a *slc30a8<sup>hu1798</sup>* larva.

(B) A transgenic reporter *mt2:gfp* is expressed in the same tissues demonstrated in (A), and additionally in the gut. The box indicates the neural tube region magnified in (D).

(C) Dorsal view of a *slc30a8<sup>hu1798</sup>* larva showing *mt2:gfp* expression and TSQ-Zn fluorescence.

(D) Magnification of the neural tube of a *slc30a8<sup>hu1798</sup>* larva, showing spatial separation between cells expressing *mt2:gfp* and cells containing deposits of TSQ-Zn.

(E) TSQ fluorescence and *mt2:gfp* expression in sibling and *nacre<sup>w2</sup>* larvae incubated with low-dose (100 nM)  $ZnCl_2$  from 4 to 6 dpf.

Scale bar in (B, C, E) = 100  $\mu m$ , (D) = 10  $\mu m$ .

## 236 Visual function is severely impaired in *slc30a8* mutants

237 The reduced levels of zinc in the eyes of *slc30a8*<sup>hu1798</sup> larvae, together with the increased pigmentation  
 238 (suggesting a failure of background adaptation) led us to consider that there might be some sort of visual  
 239 impairment in *slc30a8*<sup>hu1798</sup> larvae, resulting in blindness. We tested visual function by measuring the  
 240 optokinetic response (OKR) in 6 dpf larvae. This experiment found oculomotor movements in  
 241 *slc30a8*<sup>hu1798</sup> mutants to be nearly absent under a range of contrasts, spatial or temporal frequencies  
 242 (Fig. 5A, repeated-measures ANOVA, P< 0.001). In order to directly test the involvement of the outer  
 243 retina in this visual defect, we performed the electroretinogram (ERG) to measure the field potential of  
 244 the retina. Fig. 5B presents ERG traces recorded from sibling and mutant larvae. The b-wave amplitude  
 245 is proportional to stimulus intensity before saturation and hence a reliable read-out of outer retina  
 246 function (Fig. 5C). In mutants, although the b-wave amplitude was still intensity dependent, the  
 247 amplitude was dramatically reduced (repeated-measures ANOVA, P<0.001) compared to siblings.  
 248 Since the b-wave amplitude was reduced by more than 90% in *slc30a8*<sup>hu1798</sup> larvae and there was still  
 249 no measurable a-wave, the defect is likely connected to light perception in photoreceptors.

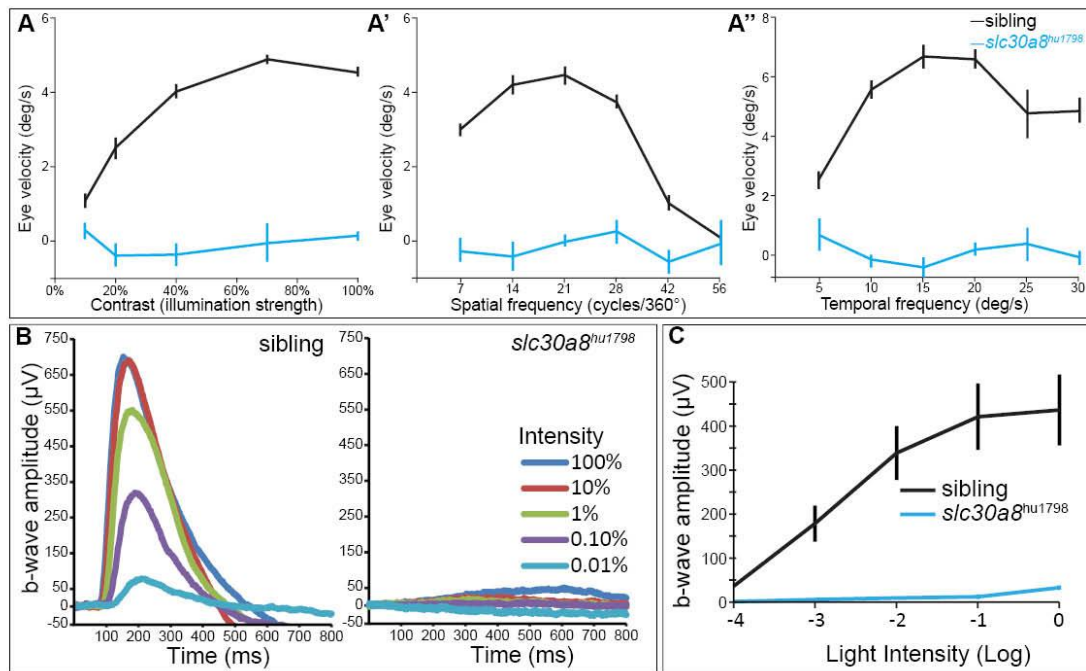

250

251 **Figure 5:** *Slc30a8*<sup>hu198</sup> mutant larvae exhibit visual impairments.

252 (A) Eye velocity elicited by the optokinetic response (OKR) was measured at different contrast (5%,  
 253 10%, 20%, 40%, 70% and 100% of full illumination) with a spatial frequency of 20 cycles/360° and an  
 254 angular velocity of 7.5 deg/s.

255 (A') Eye velocity measured at different spatial frequency (7, 14, 21, 28, 42, 56 cycles/360°) with contrast  
 256 of 70% and an angular velocity of 7.5 deg/s.

257 (A'') Eye velocity measured at different temporal frequency (5, 10, 15, 20, 25, 30 deg/s) with contrast  
 258 of 100% and a spatial frequency of 20 cycles/360°.

259 (B) Sample electroretinogram (ERG) recordings of a sibling and *slc30a8*<sup>hu1798</sup> larvae (6 dpf) in response  
 260 to flashes at different light intensity (100%, 10%, 1%, 0.1% and 0.01% of maximum intensity). Flash  
 261 duration was 100 ms and the interval was 10 s. Each trace is the average of two responses.

262 (C) Averaged data collected from sibling and *slc30a8*<sup>hu1798</sup> larvae (n=5 each) showing the dependence  
 263 of ERG b-wave amplitude on the relative light intensity.

264

## 265 Evidence of photodamage in the retina of *slc30a8* mutants

266 To assess zinc distribution in the retina we performed TSQ staining on plastic sections. Due to strong  
267 autofluorescence in fixed eye tissue (particularly the photoreceptors), images were taken before and  
268 after TSQ incubation and the difference calculated using software (ImageJ). SYTOX Green was used  
269 to label nuclei and BODIPY-TR methyl ester was used to label the photoreceptor outer segments (OS)  
270 (Cooper et al., 2005). In siblings, intense TSQ-Zn fluorescence was observed in the photoreceptor OS,  
271 while in *slc30a8<sup>hu1798</sup>* larvae the OS layer was not visible at all, and the outer plexiform and nuclear  
272 layers (OPL, ONL) were disorganised. TSQ was visible in the RPE of both genotypes. (**Fig. 6A**). Based  
273 on these observations we infer that the TSQ-Zn fluorescence we observed in the eyes of whole-mount  
274 siblings but not mutants (Fig. 2C) is emanating from the photoreceptors. To test this, we examined the  
275 retinas of sibling and *nacre<sup>w2</sup>* larvae under normal conditions or after treatment with 50  $\mu$ M ZnCl<sub>2</sub>. As  
276 expected, TSQ-Zn fluorescence in the photoreceptors became more intense after this treatment, and  
277 particularly so in the *nacre<sup>w2</sup>* larvae (**Fig. 6B**), echoing the observations in Fig. 4E. The photoreceptors  
278 of zinc-treated *nacre* larvae did not appear to be damaged suggesting that functional Slc30a8 allows  
279 retinas to tolerate elevated zinc content.

280 As zinc is known to play a protective role in the retina (Ugarte and Osborne, 2014) we tested the  
281 hypothesis that mutant photoreceptors might be damaged by light by raising embryos in complete  
282 darkness (or a normal light/dark cycle) to 6 dpf and staining plastic sections with BODIPY-TR methyl  
283 ester. Compared to siblings, the retinas of mutant larvae raised under normal lighting were virtually  
284 devoid of BODIPY-positive foci (**Fig. 6C**). Raising *slc30a8<sup>hu1798</sup>* embryos in darkness led to an increase  
285 in the number of BODIPY-positive foci (**Fig. 6C,D**; mean 73 (SEM 3.2) VS 12 (SEM 2.69) cells per  
286 mm; n=4); however these foci were small and irregular compared to the organised pattern of  
287 photoreceptors in wild-type retina. The outer plexiform layer, normally highly disrupted in mutants,  
288 was also partially restored in embryos raised in darkness. Supporting the BODIPY labelling data,  
289 quantitative PCR (qPCR) analysis of rhodopsin expression suggested an increase in rod photoreceptor  
290 mRNA when mutant embryos were reared in the dark (**Fig. 6E**; expression relative to sibling: 0.39  
291 (SEM 0.04) VS 0.86 (SEM 0.08); n=3). Although dark rearing improved retinal structure and opsin  
292 expression levels, OKR experiments on dark-raised mutant larvae failed to elicit a response, indicating  
293 that the larvae still have a visual deficiency (data not shown). These results suggest that photoreceptor  
294 loss in *slc30a8<sup>hu1798</sup>* mutants is partially mediated by light but raising larvae in darkness is not sufficient  
295 to restore visual function.

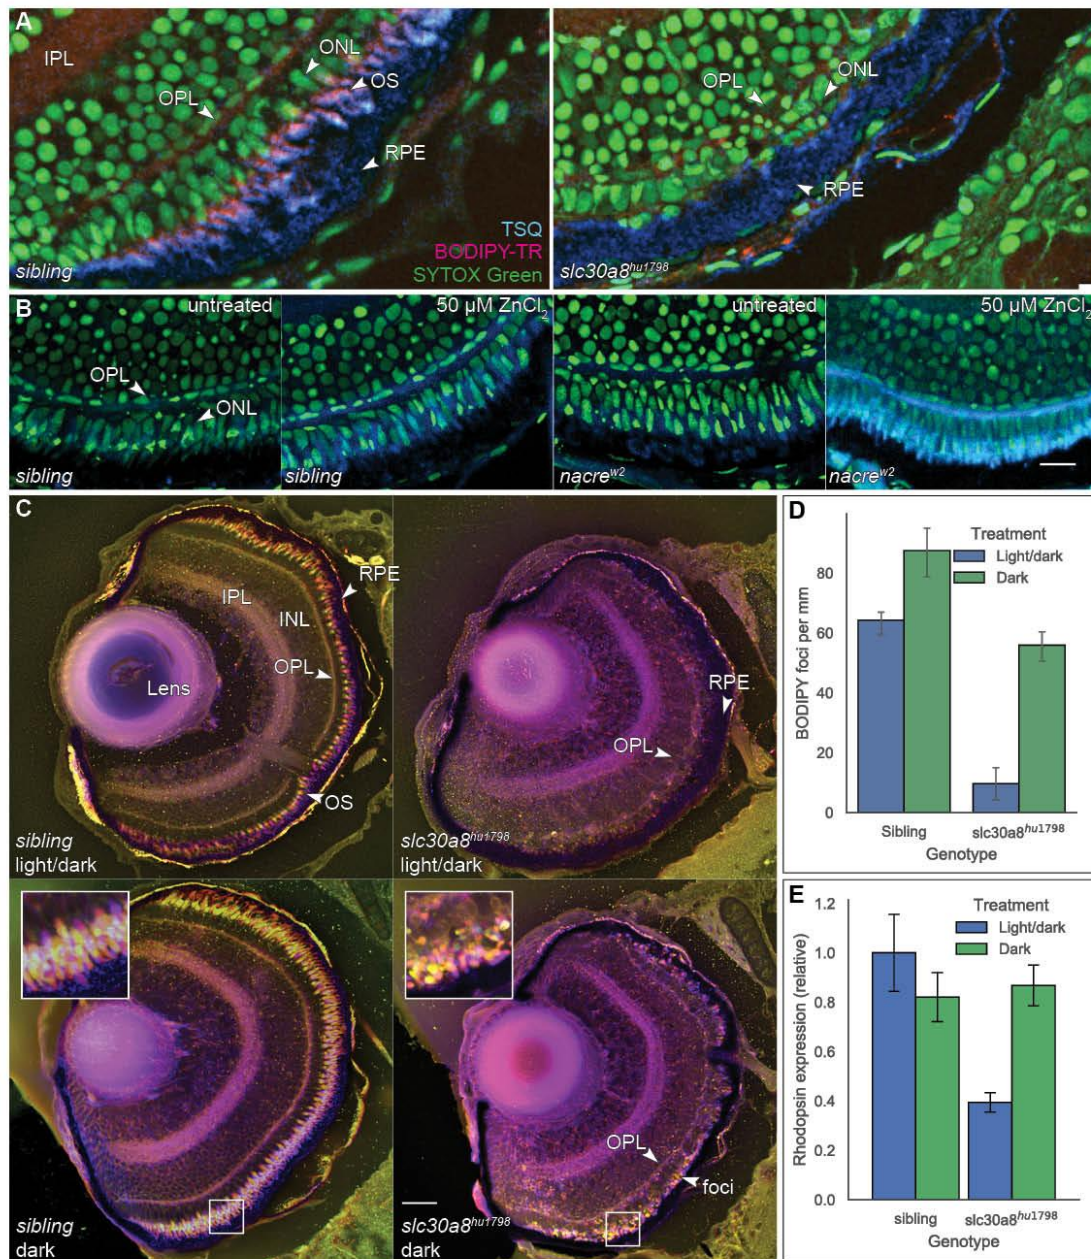

296

297 **Figure 6:** The eyes of mutant larvae exhibit signs of photodamage caused by loss of zinc distribution.  
 298 **(A)** Sections of the eye stained with SYTOX Green to label nuclei, BODIPY-TR methyl ester to label  
 299 photoreceptor outer segments (OS) and TSQ to label zinc. OPL: outer plexiform layer. IPL: inner  
 300 plexiform layer. ONL: outer nuclear layer. RPE: retinal pigment epithelium.  
 301 **(B)** *nacre<sup>w2</sup>* larvae treated with  $\text{ZnCl}_2$  showed an increase in TSQ-Zn fluorescence in the photoreceptor  
 302 OS.  
 303 **(C)** Histological sections from the eyes of 6 dpf larvae raised in normal light/dark cycles or complete  
 304 darkness, stained by BODIPY-TR and displayed with depth-colour-coding to highlight the photoreceptor  
 305 OS. White squares indicate the magnified (inset) views.  
 306 **(D)** Density of BODIPY-positive foci in retinal outer segments (n=4 per group).  
 307 **(E)** Expression of rhodopsin as measured by qPCR and normalised to the sibling light/dark sample (n=3  
 308 per group).  
 309 Scale bar in (A, B) = 10  $\mu\text{m}$ , (C) = 100  $\mu\text{m}$ .

## 310 Discussion

311 In this study, we have shown that as development proceeds, wild-type zebrafish larvae accumulate zinc  
312 in melanophores and photoreceptors, while *slc30a8<sup>hu1798</sup>* larvae do not and consequently accumulate  
313 zinc in bone elements and the brain instead. Furthermore, mutant larvae are blind and almost devoid of  
314 bone mineral. We draw three conclusions from these results: a major (perhaps primary) role of Slc30a8  
315 is to deliver zinc into melanophores and photoreceptors; photoreceptors die without zinc; and excessive  
316 zinc inhibits bone mineralization.

### 317 Function of Slc30a8

318 The mutation identified in *slc30a8<sup>hu1798</sup>* larvae of a strictly-conserved residue, H239Q, is expected to  
319 abolish the function of the Slc30a8 (Znt8) transporter; the bacterial counterpart of this particular residue  
320 (H153 of *E. coli* YiiP) directly binds to Zn<sup>2+</sup> as observed by X-ray crystallography, and substitutions of  
321 it abolish zinc transport (Lu and Fu, 2007). In the mutant phenotype described here, this loss of transport  
322 results in a loss of zinc in melanophores but the exact mechanism underlying this phenotype remains  
323 elusive. Mammalian Slc30a8 transports zinc out of the cytoplasm into insulin vesicles; perhaps  
324 zebrafish Slc30a8 is similarly located on the membrane of melanosomes, where it supplies zinc to be  
325 stored within the melanin pigment. Using ISH we were unable to detect *slc30a8* expression in  
326 melanophores using *tyr* as a positive marker (**Fig. S2**) but could detect it in sections of RPE of mutants  
327 (**Fig. S3**). A previous study using RNAseq reported an enrichment in *slc30a8* transcripts in both  
328 melanophores and the RPE (Higdon et al., 2013) compared to whole larvae at 3 dpf.

329 The association between zinc and pigmented tissues has been noted from studies of the mammalian iris  
330 (Bowness et al., 1952; Kokkinou et al., 2004), and an affinity of melanin for inorganic ions such as Zn<sup>2+</sup>  
331 and Cu<sup>2+</sup> has been reported from *in vitro* studies (Potts and Au, 1976; Sarna et al., 1980). More recently,  
332 X-ray absorption spectroscopy analysis of pigmented bird feathers showed the distribution of zinc  
333 (along with copper and calcium) to be highly correlated with the distribution of melanin (Edwards et  
334 al., 2016). It seems this affinity is exploited - at least in developing zebrafish - to provide a zinc  
335 sequestration pool. An examination of the sub-cellular location of Slc30a8 will yield insights into this  
336 sequestration process.

### 337 Zinc as a mineralisation inhibitor

338 Is the hypo-mineralised phenotype of *slc30a8<sup>hu1798</sup>* and *nacre* larvae (when challenged with Zn<sup>2+</sup>)  
339 directly caused by excessive zinc in the bone itself? Zinc is a normal component of bone, and zinc  
340 deficiency is associated with low bone mass in rats and humans (Eberle et al., 1999; Hyun et al., 2004).  
341 Zinc supplementation also increases bone density in rats and healthy humans (Seco et al., 1998; Peretz  
342 et al., 2001), particularly in patients with low zinc status (Fung et al., 2013). Studies *in vitro*, however,  
343 have shown that Zn<sup>2+</sup> ions inhibit the formation of calcium hydroxyapatite crystals, a notion which we  
344 here confirm *in vivo*; the Zn<sup>2+</sup> nucleus is larger than Ca<sup>2+</sup>, so its inclusion distorts the growing crystal  
345 lattice ("crystal poison") (Bigi et al., 1995; Kanzaki et al., 2000; Chaikina et al., 2020). Zinc-doped  
346 hydroxyapatite is of great interest as a biomaterial as it appears that low concentrations of zinc (0.3-  
347 1.6% w/w) appears to enhance bone regeneration when used as an implant (or implant coating)

348 compared to HA alone (Kawamura et al., 2000; Tao et al., 2016; Thian et al., 2013) via several  
349 mechanisms including inhibition of bone resorption (reviewed in Cruz et al., 2018).

350 Zinc may be beneficial for mature bone mineral density in humans, but it appears that zinc accumulation  
351 to the degree observed in *slc30a8<sup>hu1798</sup>* larvae is pathological for bone formation. Further insights into  
352 this balance may come from exploiting the propensity of *nacre* larvae to take up ZnCl<sub>2</sub> from the media  
353 into the bone elements.

### 354 **Zinc deficiency in the eye causes visual impairment**

355 In our experiments in *slc30a8<sup>hu1798</sup>* larvae, we observed missing photoreceptor outer segments and  
356 disrupted outer plexiform and nuclear layers, a 2-fold reduction in rhodopsin expression, severely  
357 reduced ERG b-waves, and eyes which cannot follow moving targets. The morphological disruption in  
358 the retina is exacerbated by exposure to light. We speculate that this is the consequence of a lack of zinc  
359 transport from the RPE to the photoreceptors. An alternative hypothesis is that, similar to the bone  
360 phenotype, retinal degeneration in *slc30a8<sup>hu1798</sup>* larvae may be caused by toxic levels of zinc resulting  
361 from the loss of melanophore-provided sequestration. We treated *nacre<sup>w2</sup>* larvae with ZnCl<sub>2</sub> at a  
362 concentration which inhibited bone mineralisation and did not observe overt disruption of photoreceptor  
363 morphology; in fact, photoreceptors appeared to readily take up zinc in the outer segments. Presumably,  
364 then, Slc30a8 has another role in the retina, unrelated to zinc sequestration in the melanophores. The  
365 RPE is known to contain a high concentration of zinc and most ZIP and Znt transporters (including  
366 Slc30a8) are present in these cells (Leung et al., 2008). We propose that Slc30a8 facilitates the transport  
367 of zinc from the RPE to the photoreceptors.

368 Zebrafish, as other vertebrates, have two functional visual cycles, the canonical involving the retinal  
369 pigment epithelium (RPE) and a cone-specific alternative cycle involving Muller glia cells (reviewed  
370 in Fleisch and Neuhauss, 2010). Mutations in most genes coding for components of both pathways are  
371 linked to outer retinal dystrophies (reviewed in Berger et al., 2010), providing a rationale for the  
372 observed phenotype in *slc30a8* mutants. Zinc influences the function of a number of proteins in the  
373 visual transduction cascade (Ugarte and Osborne, 2014), such as the recycling of all-*trans* retinol into  
374 11-*cis* retinal by the zinc-dependent enzyme, retinal dehydrogenase. Mice carrying a null mutation for  
375 this enzyme experience light-mediated apoptosis of the photoreceptors (Maeda et al., 2006). Zinc  
376 deficiency is also linked to caspase-dependent apoptosis of cultured retinal cells, including RPE,  
377 photoreceptor and retinal ganglia cells (Hyun et al., 2000; Shindler et al., 2000; Tamada et al., 2007).  
378 In rats kept on a zinc-deficit diet for several weeks, rod photoreceptor outer segment degeneration has  
379 been reported (Leure-duPree and McClain, 1982). In humans, zinc deficiency has been shown to lead  
380 to defects in the scotopic (dark adapted) ERG (Mochizuki et al., 2006) indicating a prominent role of  
381 zinc for rod function.



## 382 Conclusion

383 We note two distinct functions of Slc30a8 in zebrafish. Our results show that Slc30a8 is required for  
384 storing zinc in melanophores which appear to function as a major zinc reservoir. The loss of this  
385 function during development leads to accumulation of zinc in other tissues (notably the brain and bone  
386 elements) with developmental/pathological consequences. The second function is in the eye, where we  
387 propose Slc30a8 maintains retinal health by transporting zinc to photoreceptors from the RPE. In the  
388 case of *nacre* fish which lack melanophores, melanophore zinc storage is unavailable but the RPE is  
389 intact and zinc is still delivered to the photoreceptors. This allows for normal vision and apparently  
390 provides a secondary zinc reservoir which may explain why the *nacre* phenotypes are mild compared  
391 to that of *slc30a8<sup>hu1798</sup>* mutants. The discovery here of two zebrafish lines with altered zinc homeostasis  
392 provides an opportunity to investigate the role of zinc as an inhibitor (and perhaps, an enhancer) of bone  
393 mineralisation as well as its effect on retinal function, using a highly tractable model organism.

## 394 Materials and Methods

### 395 Zebrafish husbandry and positional cloning

396 Zebrafish were maintained under standard husbandry conditions according to FELASA guidelines  
397 (Aleström et al., 2019). Larvae were raised in E3 media (5 mM NaCl, 17 µM KCl, 330 µM CaCl<sub>2</sub>, 330  
398 µM MgSO<sub>4</sub>) at 28°C. A forward genetic screen using ethylnitrosourea (ENU)-induced mutagenesis and  
399 alizarin red to examine bone development was performed as described previously (Huitema et al., 2012;  
400 Spoorendonk et al., 2010). The mutation in *slc30a8* was mapped using positional cloning (Geisler,  
401 2002) and confirmed by Sanger-sequencing. Subsequent genotyping of the *hu1798* allele was  
402 performed using the KASP assay mix (LGC Genomics, Hoddesdon UK) with the following primers:

403 Wildtype: 5'-GAAGGTGACCAAGTTCATGCTCAGCAGATCTCCAATCACA-3',

404 Mutant: 5'-GAAGGTCGGAGTCAACGGATTAGCAGATCTCCAATCACT-3',

405 Common reverse: 5'-GCTAGTGTCCGGGCGGCGTT-3'.

### 406 Whole-mount in situ hybridization

407 ISH was performed as described (Schulte-Merker, 2002; Thisse and Thisse, 2008). The templates for  
408 *slc30a8*, *mt2* and *tyr* were amplified from zebrafish cDNA using the following primer pairs. Probes  
409 were detected with HRP anti-Dig Fab (Roche Diagnostics, Mannheim, Germany).

410 Slc30a8\_f: 5'-TCAGTCTGTGTTTCGCTCTGG-3',

411 Slc30a8\_r: 5'-TTTCTCGAAGCACCTCCTGT-3',

412 Mt2\_f: 5'-ATTTCTAAGGAACTTTCAAGC-3',

413 Mt2\_r: 5'-TTACAGACATACGATTTAGGTGACACT-3',

414 Tyr\_f: 5'-TTACAACCAAACCTGCCAGTGC-3',

415 Tyr\_r: 5'-ACTGAAGACATGGAGCCGTTCA-3'.

## 416 **Whole mount histochemistry**

417 Dithizone (Sigma-Aldrich, St. Louis, Missouri) (20 mg/mL) was dissolved in DMSO with 0.1 M Tris  
418 base (Yuan, 2011) and used 1:1000 in E3. For the von Kossa stain, embryos were incubated with 10%  
419 silver nitrate in water under bright light for 10 minutes. For TSQ fluorescence, TSQ (6-methoxy-8-p-  
420 toluenesulfonamido-quinoline, Sigma-Aldrich) was dissolved in DMSO to 2 mg/mL and used 1:200 in  
421 E3. Larvae were stained for at least one hour and imaged directly with an Olympus SZX16  
422 stereomicroscope (dithizone) or Leica SPE confocal (TSQ).

## 423 **Metal determination**

424 Larvae (4 dpf) were anaesthetized and selected based on pigmentation phenotype. Groups of 10 larvae  
425 were collected in 2 mL tubes, rinsed with MilliQ water and dried in a vacuum at 60°C. Samples were  
426 digested in 1 mL of 3% HNO<sub>3</sub> overnight at 70°C. Determination was performed by ICP-AES at the  
427 department of Earth Sciences, UCL.

## 428 **Metallothionein:GFP construct**

429 The 1428-bp metallothionein promoter was cloned with the following primers into a vector containing  
430 EGFP and Tol2 sites for stable transgenesis (Kawakami, 2004):

431 Mt\_promoter\_f: 5'-AGAGACACTGCACACGTTAC-3',

432 Mt\_promoter\_r: 5'-CAGAGAGTATCCACAA-3'.

433 Injected larvae were sorted based on GFP expression, raised to adulthood, and outcrossed to establish  
434 a stable line.

## 435 **Rhodopsin qPCR**

436 Whole-tissue RNA was extracted from larvae at 6 dpf, reverse transcribed with Superscript III, and  
437 amplified with SYBR Green qPCR master mix (both from Thermo Fisher, Waltham, Massachusetts)  
438 using the following primers:

439 Rho\_qpcr\_f: 5'-ACTTCCGTTTCGGGGAGAAC-3',

440 Rho\_qpcr\_r: 5'-GAAGGACTCGTTGTTGACAC-3'.

## 441 **Visual function**

442 Electroretinograms were recorded on isolated eyes from 6 dpf zebrafish larvae as previously described  
443 (Zang et al., 2015). Briefly, siblings and mutants were dark adapted for half an hour in Ringer's solution  
444 (111 mM NaCl, 2.5 mM KCl, 1 mM CaCl<sub>2</sub>, 1.6 mM MgCl<sub>2</sub>, 10 µM EDTA, 10 mM glucose, and 3 mM  
445 HEPES buffer, adjusted to pH 7.7–7.8 with NaOH). Afterwards larvae were placed in the centre of the  
446 recording chamber which was filled with 1% agarose. Eyes were removed by pulling the body with  
447 forceps while cutting the optic nerve by a Tungsten wire loop. The eye was then repositioned to allow  
448 the cornea to face the light source (ZEISS XBO 75W). The recording pipette (1.0 mm O.D. \*0.58 mm  
449 I.D., GC100F-10, Harvard Apparatus, [Holliston, Massachusetts](#)) with a diameter around 20 µm was  
450 filled with Ringer's solution and positioned on the centre of the cornea. 100% light intensity was 591  
451 lux, flash duration was 100 ms with stimulus intervals of 10 s. The stimulus started from 100% intensity

452 and decreased to 0.01% and then went up again to 100%. The b-wave amplitude was calculated as the  
453 average of two responses.

454 The optokinetic response (OKR) was performed as described (Huber-Reggi et al., 2012; Rinner et al.,  
455 2005). The larva was immobilized by being embedded dorsal-up in a 35 mm petri dish filled with  
456 prewarmed (28°C) 3% methylcellulose. In this condition the eyes can move freely while body  
457 movements are restrained. The petri dish was then placed in the centre of a drum with black and white  
458 gratings projected by computer generated stimulus via an LCD projector (PLV-Z3000; Sanyo). Both  
459 eyes were stimulated at a maximal illumination of 400 lux. To determine contrast sensitivity, a spatial  
460 frequency of 20 cycles/360° and an angular velocity of 7.5 deg/s was used with varying contrast (5%,  
461 10%, 20%, 40%, 70% and 100%). To determine spatial sensitivity, an angular velocity of 7.5/s and 70%  
462 of the maximum illumination was used with varying spatial frequency (7, 14, 21, 28, 42, 56  
463 cycles/360°). To determine temporal sensitivity, maximum illumination and 20 cycles/360° were used  
464 with varying temporal frequency (5, 10, 15, 20, 25, 30 deg/s).

465 Statistical analysis was performed by SPSS (IBM) using repeated-measures ANOVA. The ERG graphs  
466 were generated by Excel and OKR graphs were generated by SPSS.

## 467 **Retinal histology**

468 Fixed larvae were embedded in JB-4 resin (Sigma Aldrich) and 10 µm sections were cut with a  
469 microtome. Sections were stained with BODIPY TR methyl ester (Thermo Fisher) diluted 1:200,  
470 SYTOX Green (Thermo Fisher) 1:30000, and/or TSQ 1:200, all for 30 minutes. BODIPY foci were  
471 counted along the retinal OS layer and normalised for OS length.

## 472 **Acknowledgements**

473 S.S.-M. acknowledges support from the Smart Mix Programme of the Netherlands Ministry of  
474 Economic Affairs, the European Space Agency, and TreatOA (Translational Research in Europe  
475 Applied Technologies for OsteoArthritis, FP7). The authors wish to thank S. Carter, L. Lleras, I. Bianco,  
476 T. Hawkins and K. Tuschl for valuable advice and manuscript proofreading. This study was supported  
477 by a Wellcome Trust Investigator Award (095722/Z/11/Z) to SW and an MRC Programme Grant  
478 (MR/L003775/1) to SW and Gaia Gestri.

## 479 **Author contributions**

480 E.M. performed experiments and analysed data, except for visual function studies and analysis (J.Z.  
481 and S.N). E.M., S.N., S.S.-M. and S.W. conceived experiments and E.M wrote the manuscript with  
482 input from S.N, S.W and S.S.-M. J.P.M contributed to positional cloning of the *hu1798* allele. S.I.M  
483 contributed eye histology work and L.H.T contributed ISH work.

484

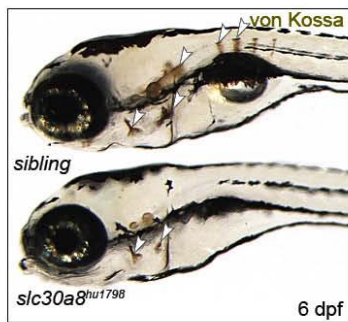

485 **Figure S1:** The von Kossa stain shows a reduction of phosphate in *slc30a8*<sup>hu1798</sup> larvae. Arrowheads  
486 indicate bone elements.

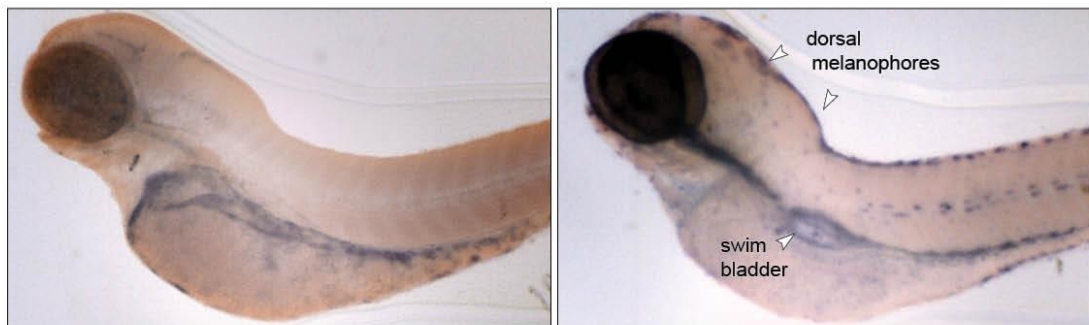

487 **Figure S2:** comparison of ISH staining using NBT-BCIP (blue) for *slc30a8* (left) and *tyr* (tyrosinase,  
488 right). Unlike *slc30a8*, *tyr* is detected in pigmented cells (arrowheads). The larvae here are 4 dpf  
489 *slc30a8*<sup>hu1798</sup> and were bleached with peroxide prior to staining to remove endogenous pigment.  
490

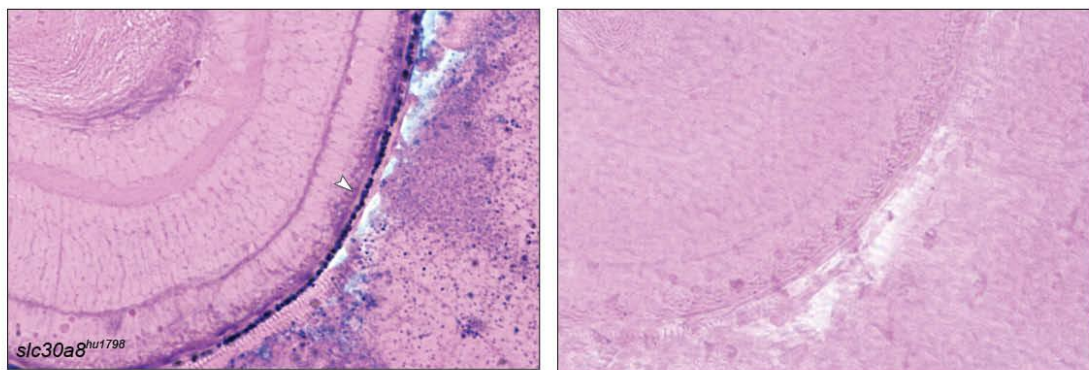

491 **Figure S3:** A section of an *slc30a8*<sup>hu1798</sup> eye labelled with an *in situ* hybridization probe for *slc30a8*,  
492 demonstrating expression in the RPE. Arrowhead indicates a pattern of *slc30a8* expression (blue NBT-  
493 BCIP). Pink counterstain: eosin. Right: a sibling eye section stained with the same probe. Both sections  
494 were bleached to remove endogenous pigment.  
495

## 496 References

- 497 Aleström, P., D'Angelo, L., Midtlyng, P.J., Schorderet, D.F., Schulte-Merker, S., Sohm, F., and Warner,  
498 S. (2019). Zebrafish: Housing and husbandry recommendations: Lab. Anim.
- 499 Berger, W., Kloeckener-Gruissem, B., and Neidhardt, J. (2010). The molecular basis of human retinal  
500 and vitreoretinal diseases. *Prog. Retin. Eye Res.* 29, 335–375.
- 501 Bigi, A., Foresti, E., Gandolfi, M., Gazzano, M., and Roveri, N. (1995). Inhibiting effect of zinc on  
502 hydroxylapatite crystallization. *J. Inorg. Biochem.* 58, 49–58.
- 503 Black, M.M. (1998). Zinc deficiency and child development. *Am. J. Clin. Nutr.* 68, 464S-469S.
- 504 Bowness, J.M., Morton, R.A., Shakir, M.H., and Stubbs, A.L. (1952). Distribution of copper and zinc  
505 in mammalian eyes. Occurrence of metals in melanin fractions from eye tissues. *Biochem J* 51, 521–  
506 530.
- 507 Brun, N.R., Lenz, M., Wehrli, B., and Fent, K. (2014). Comparative effects of zinc oxide nanoparticles  
508 and dissolved zinc on zebrafish embryos and eleuthero-embryos: Importance of zinc ions. *Sci. Total*  
509 *Environ.* 476–477, 657–666.
- 510 Capasso, M., Jeng, J.-M., Malavolta, M., Mocchegiani, E., and Sensi, S.L. (2005). Zinc dyshomeostasis:  
511 A key modulator of neuronal injury. *J. Alzheimers Dis.* 8, 93–108.
- 512 Chaikina, M.V., Bulina, N.V., Prosanov, I.Y., Vinokurova, O.B., and Ishchenko, A.V. (2020). Structure  
513 Formation of Zinc-Substituted Hydroxyapatite during Mechanochemical Synthesis. *Inorg. Mater.* 56,  
514 402–408.
- 515 Chen, W.-Y., John, J.A.C., Lin, C.-H., Lin, H.-F., Wu, S.-C., Lin, C.-H., and Chang, C.-Y. (2004).  
516 Expression of metallothionein gene during embryonic and early larval development in zebrafish. *Aquat.*  
517 *Toxicol.* 69, 215–227.
- 518 Chimienti, F., Devergnas, S., Favier, A., and Seve, M. (2004). Identification and Cloning of a  $\beta$ -Cell–  
519 Specific Zinc Transporter, ZnT-8, Localized Into Insulin Secretory Granules. *Diabetes* 53, 2330–2337.
- 520 Chowanadisai, W., Lönnerdal, B., and Kelleher, S.L. (2006). Identification of a Mutation in SLC30A2  
521 (ZnT-2) in Women with Low Milk Zinc Concentration That Results in Transient Neonatal Zinc  
522 Deficiency. *J. Biol. Chem.* 281, 39699–39707.
- 523 Cooper, M.S., Szeto, D.P., Sommers-Herivel, G., Topczewski, J., Solnica-Krezel, L., Kang, H.-C.,  
524 Johnson, I., and Kimelman, D. (2005). Visualizing morphogenesis in transgenic zebrafish embryos  
525 using BODIPY TR methyl ester dye as a vital counterstain for GFP. *Dev. Dyn.* 232, 359–368.
- 526 Cruz, R., Calasans-Maia, J., Sartoretto, S., Moraschini, V., Rossi, A.M., Louro, R.S., Granjeiro, J.M.,  
527 and Calasans-Maia, M.D. (2018). Does the incorporation of zinc into calcium phosphate improve bone  
528 repair? A systematic review. *Ceram. Int.* 44, 1240–1249.
- 529 Danscher, G., Howell, G., Perez-Clausell, J., and Hertel, N. (1985). The dithizone, Timm's sulphide  
530 silver and the selenium methods demonstrate a chelatable pool of zinc in CNS. A proton activation  
531 (PIXE) analysis of carbon tetrachloride extracts from rat brains and spinal cords intravitaly treated with  
532 dithizone. *Histochemistry* 83, 419–422.
- 533 Dineley, K.E., Votyakova, T.V., and Reynolds, I.J. (2003). Zinc inhibition of cellular energy  
534 production: implications for mitochondria and neurodegeneration. *J. Neurochem.* 85, 563–570.
- 535 Eberle, J., Schmidmayer, S., Erben, R.G., Stangassinger, M., and Roth, H.P. (1999). Skeletal Effects of  
536 Zinc Deficiency in Growing Rats. *J. Trace Elem. Med. Biol.* 13, 21–26.
- 537 Edwards, N.P., Veelen, A. van, Anné, J., Manning, P.L., Bergmann, U., Sellers, W.I., Egerton, V.M.,  
538 Sokaras, D., Alonso-Mori, R., Wakamatsu, K., et al. (2016). Elemental characterisation of melanin in  
539 feathers via synchrotron X-ray imaging and absorption spectroscopy. *Sci. Rep.* 6, 1–10.

- 540 Feeney, G.P., Zheng, D., Kille, P., and Hogstrand, C. (2005). The phylogeny of teleost ZIP and ZnT  
541 zinc transporters and their tissue specific expression and response to zinc in zebrafish. *Biochim.*  
542 *Biophys. Acta BBA - Gene Struct. Expr.* 1732, 88–95.
- 543 Fleisch, V.C., and Neuhauss, S.C.F. (2010). Parallel visual cycles in the zebrafish retina. *Prog. Retin.*  
544 *Eye Res.* 29, 476–486.
- 545 Frederickson, C.J., Kasarskis, E.J., Ringo, D., and Frederickson, R.E. (1987). A quinoline fluorescence  
546 method for visualizing and assaying the histochemically reactive zinc (bouton zinc) in the brain. *J.*  
547 *Neurosci. Methods* 20, 91–103.
- 548 Frederickson, C.J., Koh, J.-Y., and Bush, A.I. (2005). The neurobiology of zinc in health and disease.  
549 *Nat Rev Neurosci* 6, 449–462.
- 550 Fung, E.B., Kwiatkowski, J.L., Huang, J.N., Gildengorin, G., King, J.C., and Vichinsky, E.P. (2013).  
551 Zinc supplementation improves bone density in patients with thalassemia: a double-blind, randomized,  
552 placebo-controlled trial. *Am. J. Clin. Nutr.* 98, 960–971.
- 553 Geisler, R. (2002). Mapping and cloning. In *Zebrafish: A Practical Approach*, C. Nusslein-Volhard, and  
554 R. Dahm, eds. (OUP Oxford), p.
- 555 Hara, T., Takeda, T., Takagishi, T., Fukue, K., Kambe, T., and Fukada, T. (2017). Physiological roles  
556 of zinc transporters: molecular and genetic importance in zinc homeostasis. *J. Physiol. Sci.* 67, 283–  
557 301.
- 558 Higdon, C.W., Mitra, R.D., and Johnson, S.L. (2013). Gene Expression Analysis of Zebrafish  
559 Melanocytes, Iridophores, and Retinal Pigmented Epithelium Reveals Indicators of Biological Function  
560 and Developmental Origin. *PLoS ONE* 8.
- 561 Hiu-Mei Yan, C., and Chan, K.M. (2002). Characterization of zebrafish metallothionein gene promoter  
562 in a zebrafish caudal fin cell-line, SJD.1. *Mar. Environ. Res.* 54, 335–339.
- 563 Huang, L., and Gitschier, J. (1997). A novel gene involved in zinc transport is deficient in the lethal  
564 milk mouse. *Nat Genet* 17, 292–297.
- 565 Huang, L., and Tepasamorndech, S. (2013). The SLC30 family of zinc transporters – A review of current  
566 understanding of their biological and pathophysiological roles. *Mol. Aspects Med.* 34, 548–560.
- 567 Huber-Reggi, S.P., Chen, C.-C., Grimm, L., Straumann, D., Neuhauss, S.C.F., and Huang, M.Y.-Y.  
568 (2012). Severity of Infantile Nystagmus Syndrome-Like Ocular Motor Phenotype Is Linked to the  
569 Extent of the Underlying Optic Nerve Projection Defect in Zebrafish *belladonna* Mutant. *J. Neurosci.*  
570 32, 18079–18086.
- 571 Huitema, L.F.A., Apschner, A., Logister, I., Spoorendonk, K.M., Bussmann, J., Hammond, C.L., and  
572 Schulte-Merker, S. (2012). *Entpd5* is essential for skeletal mineralization and regulates phosphate  
573 homeostasis in zebrafish. *Proc. Natl. Acad. Sci.* 109, 21372–21377.
- 574 Hurley, L.S., and Swenert'on, H. (1966). Congenital Malformations Resulting from Zinc Deficiency in  
575 Rats. *Proc. Soc. Exp. Biol. Med.* 123, 692–696.
- 576 Hyun, T.H., Barrett-Connor, E., and Milne, D.B. (2004). Zinc intakes and plasma concentrations in men  
577 with osteoporosis: the Rancho Bernardo Study. *Am. J. Clin. Nutr.* 80, 715–721.
- 578 Jeong, J., and Eide, D.J. (2013). The SLC39 family of zinc transporters. *Mol. Aspects Med.* 34, 612–  
579 619.
- 580 Kanzaki, N., Onuma, K., Treboux, G., Tsutsumi, S., and Ito, A. (2000). Inhibitory Effect of Magnesium  
581 and Zinc on Crystallization Kinetics of Hydroxyapatite (0001) Face. *J. Phys. Chem. B* 104, 4189–4194.
- 582 Kawakami, K. (2004). Transgenesis and gene trap methods in zebrafish by using the Tol2 transposable  
583 element. *Methods Cell Biol* 77, 201–222.

- 584 Kawamura, H., Ito, A., Miyakawa, S., Layrolle, P., Ojima, K., Ichinose, N., and Tateishi, T. (2000).  
585 Stimulatory effect of zinc-releasing calcium phosphate implant on bone formation in rabbit femora. *J.*  
586 *Biomed. Mater. Res.* *50*, 184–190.
- 587 Kimura, T., and Kambe, T. (2016). The Functions of Metallothionein and ZIP and ZnT Transporters:  
588 An Overview and Perspective. *Int. J. Mol. Sci.* *17*, 336.
- 589 Kokkinou, D., Kasper, H.U., Bartz-Schmidt, K.U., and Schraermeyer, U. (2004). The Pigmentation of  
590 Human Iris Influences the Uptake and Storing of Zinc. *Pigment Cell Res.* *17*, 515–518.
- 591 Laity, J.H., and Andrews, G.K. (2007). Understanding the mechanisms of zinc-sensing by metal-  
592 response element binding transcription factor-1 (MTF-1). *Arch. Biochem. Biophys.* *463*, 201–210.
- 593 Lemaire, K., Ravier, M.A., Schraenen, A., Creemers, J.W.M., Van de Plas, R., Granvik, M., Van  
594 Lommel, L., Waelkens, E., Chimienti, F., Rutter, G.A., et al. (2009). Insulin crystallization depends on  
595 zinc transporter ZnT8 expression, but is not required for normal glucose homeostasis in mice. *Proc.*  
596 *Natl. Acad. Sci.* *106*, 14872–14877.
- 597 Leung, K.W., Liu, M., Xu, X., Seiler, M.J., Barnstable, C.J., and Tombran-Tink, J. (2008). Expression  
598 of ZnT and ZIP Zinc Transporters in the Human RPE and Their Regulation by Neurotrophic Factors.  
599 *Invest. Ophthalmol. Vis. Sci.* *49*, 1221–1231.
- 600 Leure-duPree, A.E., and McClain, C.J. (1982). The effect of severe zinc deficiency on the morphology  
601 of the rat retinal pigment epithelium. *Invest. Ophthalmol. Vis. Sci.* *23*, 425–434.
- 602 Lister, J.A., Robertson, C.P., Lepage, T., Johnson, S.L., and Raible, D.W. (1999). nacre encodes a  
603 zebrafish microphthalmia-related protein that regulates neural-crest-derived pigment cell fate.  
604 *Development* *126*, 3757–3767.
- 605 Logan, D.W., Burn, S.F., and Jackson, I.J. (2006). Regulation of pigmentation in zebrafish  
606 melanophores. *Pigment Cell Res.* *19*, 206–213.
- 607 Lu, M., and Fu, D. (2007). Structure of the Zinc Transporter YiiP. *Science* *317*, 1746–1748.
- 608 Maeda, A., Maeda, T., Imanishi, Y., Sun, W., Jastrzebska, B., Hatala, D.A., Winkens, H.J., Hofmann,  
609 K.P., Janssen, J.J., Baehr, W., et al. (2006). Retinol Dehydrogenase (RDH12) Protects Photoreceptors  
610 from Light-induced Degeneration in Mice. *J. Biol. Chem.* *281*, 37697–37704.
- 611 Meeusen, J.W., Tomasiewicz, H., Nowakowski, A., and Petering, D.H. (2011). TSQ (6-Methoxy-8-p-  
612 Toluenesulfonamido-Quinoline), a Common Fluorescent Sensor for Cellular Zinc, Images Zinc  
613 Proteins. *Inorg. Chem.* *50*, 7563–7573.
- 614 Mochizuki, K., Murase, H., Imose, M., Kawakami, H., and Sawada, A. (2006). Improvement of  
615 scotopic electroretinograms and night blindness with recovery of serum zinc levels. *Jpn. J. Ophthalmol.*  
616 *50*, 532–536.
- 617 Neuhauss, S.C.F., Biehlmaier, O., Seeliger, M.W., Das, T., Kohler, K., Harris, W.A., and Baier, H.  
618 (1999). Genetic Disorders of Vision Revealed by a Behavioral Screen of 400 Essential Loci in  
619 Zebrafish. *J. Neurosci.* *19*, 8603–8615.
- 620 Peretz, A., Papadopoulos, T., Willems, D., Hotimsky, A., Michiels, N., Siderova, V., Bergmann, P.,  
621 and Neve, J. (2001). Zinc supplementation increases bone alkaline phosphatase in healthy men. *J. Trace*  
622 *Elem. Med. Biol.* *15*, 175–178.
- 623 Potts, A.M., and Au, P.C. (1976). The affinity of melanin for inorganic ions. *Exp. Eye Res.* *22*, 487–  
624 491.
- 625 Puchtler, H., Meloan, S.N., and Terry, M.S. (1969). On the history and mechanism of alizarin and  
626 alizarin red s stains for calcium. *J. Histochem. Cytochem.* *17*, 110–124.

- 627 Rinner, O., Rick, J.M., and Neuhauss, S.C. (2005). Contrast sensitivity, spatial and temporal tuning of  
628 the larval zebrafish optokinetic response. *Invest. Ophthalmol. Vis. Sci.* *46*, 137–142.
- 629 Rungby, J., Kassem, M., Eriksen, E., and Danscher, G. (1993). The von Kossa reaction for calcium  
630 deposits: silver lactate staining increases sensitivity and reduces background. *Histochem. J.* *25*, 446–  
631 451.
- 632 Sarna, T., Froncisz, W., and Hyde, J.S. (1980). Cu<sup>2+</sup> probe of metal-ion binding sites in melanin using  
633 electron paramagnetic resonance spectroscopy: II. Natural melanin. *Arch. Biochem. Biophys.* *202*, 304–  
634 313.
- 635 Schulte-Merker, S. (2002). Looking at embryos. In *Zebrafish: A Practical Approach*, C. Nusslein-  
636 Volhard, and R. Dahm, eds. (OUP Oxford), p.
- 637 Seco, C., Revilla, M., Hernández, E.R., Gervás, J., González-Riola, J., Villa, L.F., and Rico, H. (1998).  
638 Effects of Zinc Supplementation on Vertebral and Femoral Bone Mass in Rats on Strenuous Treadmill  
639 Training Exercise. *J. Bone Miner. Res.* *13*, 508–512.
- 640 Shusterman, E., Beharier, O., Levy, S., Zarivach, R., Etzion, Y., Campbell, C.R., Lee, I.-H.,  
641 Okabayashi, K., Dinudom, A., and Cook, D.I. (2014). ZnT-1 extrudes zinc from mammalian cells  
642 functioning as a Zn<sup>2+</sup>/H<sup>+</sup> exchanger. *Metallomics*.
- 643 Spoorendonk, K.M., Peterson-Maduro, J., Renn, J., Trowe, T., Kranenbarg, S., Winkler, C., and  
644 Schulte-Merker, S. (2008). Retinoic acid and Cyp26b1 are critical regulators of osteogenesis in the axial  
645 skeleton. *Development* *135*, 3765–3774.
- 646 Spoorendonk, K.M., Hammond, C.L., Huitema, L.F.A., Vanoevelen, J., and Schulte-Merker, S. (2010).  
647 Zebrafish as a unique model system in bone research: the power of genetics and in vivo imaging. *J.*  
648 *Appl. Ichthyol.* *26*, 219–224.
- 649 Tao, Z.-S., Zhou, W.-S., He, X.-W., Liu, W., Bai, B.-L., Zhou, Q., Huang, Z.-L., Tu, K., Li, H., Sun,  
650 T., et al. (2016). A comparative study of zinc, magnesium, strontium-incorporated hydroxyapatite-  
651 coated titanium implants for osseointegration of osteopenic rats. *Mater. Sci. Eng. C* *62*, 226–232.
- 652 Teoh, S.L., Ogawa, S., and Parhar, I.S. (2015). Localization of genes encoding metallothionein-like  
653 protein (mt2 and smtb) in the brain of zebrafish. *J. Chem. Neuroanat.* *70*, 20–32.
- 654 Thian, E.S., Konishi, T., Kawanobe, Y., Lim, P.N., Choong, C., Ho, B., and Aizawa, M. (2013). Zinc-  
655 substituted hydroxyapatite: a biomaterial with enhanced bioactivity and antibacterial properties. *J.*  
656 *Mater. Sci. Mater. Med.* *24*, 437–445.
- 657 Thisse, C., and Thisse, B. (2008). High-resolution in situ hybridization to whole-mount zebrafish  
658 embryos. *Nat Protoc.* *3*, 59–69.
- 659 Tuschl, K., Clayton, P.T., Gospe Jr, S.M., Gulab, S., Ibrahim, S., Singhi, P., Aulakh, R., Ribeiro, R.T.,  
660 Barsottini, O.G., Zaki, M.S., et al. (2012). Syndrome of Hepatic Cirrhosis, Dystonia, Polycythemia, and  
661 Hypermanganesemia Caused by Mutations in SLC30A10, a Manganese Transporter in Man. *Am. J.*  
662 *Hum. Genet.* *90*, 457–466.
- 663 Ugarte, M., and Osborne, N.N. (2014). Recent advances in the understanding of the role of zinc in  
664 ocular tissues. *Metallomics* *6*, 189–200.
- 665 Uriu-Adams, J.Y., and Keen, C.L. (2010). Zinc and reproduction: effects of zinc deficiency on prenatal  
666 and early postnatal development. *Birth Defects Res. B. Dev. Reprod. Toxicol.* *89*, 313–325.
- 667 Wu, S.M., Zheng, Y.D., and Kuo, C.-H. (2008). Expression of mt2 and smt-B upon cadmium exposure  
668 and cold shock in zebrafish (*Danio rerio*). *Comp. Biochem. Physiol. Part C Toxicol. Pharmacol.* *148*,  
669 184–193.



- 670 Xia, Z., Wei, J., Li, Y., Wang, J., Li, W., Wang, K., Hong, X., Zhao, L., Chen, C., Min, J., et al. (2017).  
671 Zebrafish *slc30a10* deficiency revealed a novel compensatory mechanism of *Atp2c1* in maintaining  
672 manganese homeostasis. *PLOS Genet.* *13*, e1006892.
- 673 Yuan, D.S. (2011). Dithizone staining of intracellular zinc: an unexpected and versatile counterscreen  
674 for auxotrophic marker genes in *Saccharomyces cerevisiae*. *PLoS One* *6*, e25830.
- 675 Zang, J., Keim, J., Kastenhuber, E., Gesemann, M., and Neuhauss, S.C.F. (2015). Recoverin depletion  
676 accelerates cone photoresponse recovery. *Open Biol.* *5*, 150086.
- 677
